# Supplementary material
Source: PubMed Central journal article supplement (PMC8278565)
Supplement: NIHMS1718551-supplement-Supplementary_File.pdf [file NIHMS1718551-supplement-Supplementary_File.pdf]

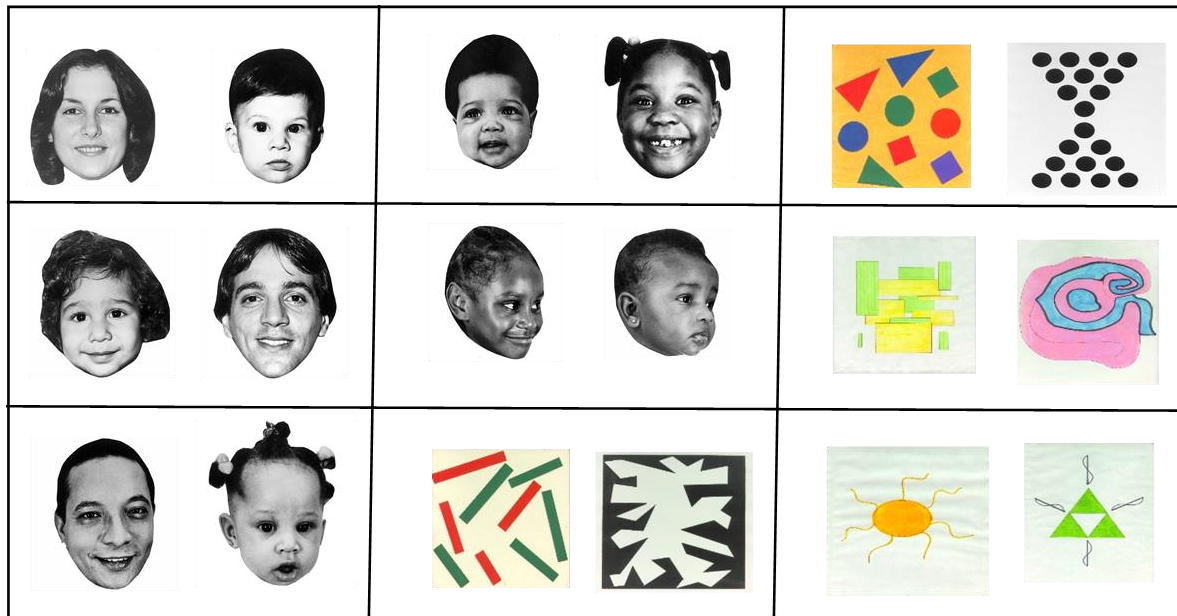

**Figure S1.** Stimulus pairs used for VRM assessment. Stimuli on the left side of each pair were the familiar stimuli in conditions for which set 1 were the familiar stimuli; stimuli on the right side of each pair were the familiar stimuli for which set 2 were the familiar stimuli. Pairs were presented in the same order in all assessment conditions, starting with the pair at the top left of this figure, through 5 pairs of faces, then 4 pairs of shapes, ending with the pair at the bottom right. *Re-printed with permission from Dzwilewski et al. (2020) Characterization of performance on an automated visual recognition memory task in 7.5- month-old infants*
